# Supplementary material for: Multivariable prognostic modelling to improve prediction of colorectal cancer recurrence: the PROSPeCT trial
Source: PubMed Central journal article supplement (PMC11519198; doi:10.1007/s00330-024-10803-7), 2024-06-05
Supplement: 330_2024_10803_MOESM1_ESM.pdf [file 330_2024_10803_MOESM1_ESM.pdf]

**Multivariable prognostic modelling to improve prediction  
of colorectal cancer recurrence: The PROSPeCT trial**

**Electronic Supplementary Material (ESM)**

## **SUPPLEMENTARY MATERIAL.**

### **Additional details regarding prognostic modelling.**

The baseline model was a Weibull parametric (STATA “stpm2”) with 1 degree-of-freedom (df), and proportional hazard assumptions checked. CT perfusion date was the reference date for calculation of date of recurrence. Date of recurrence was based on date of death or date of first scan showing recurrence, or no CT scan based on the date of the clinic visit where a decision of recurrence was made. Loss to follow up or censoring was based on the date of the last CT scan or last clinic visit.

The standard clinicopathologic model combined variables pre-specified based on the published literature and clinical opinion, consisting of tumour-node (TN) stage, age, sex, tumour location and size, extramural vascular invasion (EMVI), and planned treatment.

Model variables were selected based on the types of information that would be known at the time of model application. T stage, N stage and EMVI were from pathology reports, except where there was no baseline surgery or neoadjuvant treatment prior to surgery, which will modify pathological stage; in which case these variables were obtained from the imaging reports according to the following order: baseline CT staging, local perfusion CT, central perfusion CT. Where EMVI status was derived from central perfusion CT (either due to lack of alternative information or discordant results from pathology and local CT perfusion) interpretation was blinded to recurrence status.

Where possible, continuous variables were retained during modelling (age, tumour size) and modelled using linear relationships (after checking whether fit was improved using fractional polynomials) and centred around median values of 65 years and 40mm tumour size. Categorical variables used the following categories in modelling: tumour location as left or right colon – defined as right (reference category: corresponds to caecum, ascending colon, transverse colon without flexure or with hepatic flexure), and left (transverse colon if splenic flexure, descending colon, sigmoid colon) and rectosigmoid/rectum; T stage was included as four categories – T1, T2 (reference), T3 and T4; N stage was included as 3 categories –

N0 no lymph nodes (LN) positive, N1 one LN positive, N2 two or more LN positive; EMVI was categorised as positive or negative; treatment was grouped as 4 categories based on treatment plan at baseline imaging – surgery only, neoadjuvant therapy followed by surgery, surgery followed by adjuvant therapy, and no surgery; sex as male or female.

There was no variable selection in model development or validation (no univariable selection based on significance and no selection within model development). All model variables were pre-specified and retained in the final baseline model even if non-significant in univariable analysis. This was because significance is possible in different bootstrap versions of the model, and because these standard variables would be easily obtained in the course of normal clinical practice.

CT perfusion measured 4 parameters (blood flow per unit volume, blood volume, permeability surfaces area, mean transit time). Principal components analysis (PCA) was used to combine variables from CT perfusion for inclusion in modelling. Each CT perfusion parameters was standardized to a mean of 0 and a variance of 1, to avoid undue influence due to differences in measurement scales (STATA pca commands). We retained two principal component composite variables with eigenvalues of greater than one approximating to 70% of cumulative total variation.

Principal component scores were calculated (STATA predict pc1 pc2, score) and the contribution of CT perfusion to prediction of recurrence was based on looking for improved model prediction (sensitivity and specificity) and model fit (AIC, BIC) of nested models, when CT perfusion was added to an offset linear predictor from Model A (baseline clinical and imaging characteristics).

As a sensitivity analysis, CT perfusion variables were included as continuous linear variables without use of PCA. Genetic and immunohistochemistry variables were similarly investigated for their added predictive value compared to a Model A offset linear predictor, by including as predefined separate groups (two groups: genetic and immunohistochemistry) and as combining two groups.

324 of 326 participants had complete data for conventional variables and were used for Rule C and to develop Model A. While more participants had missing CT and

pathology variables, multiple imputation was not used because comparison was always comparing models within patients, so use of imputation would not increase statistical power [1].

### **Sample size justification**

It was estimated that 20% of participants would have metastasis at presentation and 30% would develop metastasis within 36 months [2; 3]. It was estimated that 320 patients (including 10% follow-up loss), with 80 events provided 80% power to detect a 15% difference in correct risk classification between models, based on a reclassification index similar to Pencina [4]. Model variables were pre-specified to conserve statistical power in model development. Due to higher than anticipated withdrawals at staging, sample size increased to 445 following Independent Data Monitoring Committee advice. Recruitment ceased when the original event target was achieved.

### **Model A (clinicopathological variables) equation**

Model A log cumulative hazard =  $-2.617 + 0.833 \cdot \ln(\text{time in years})$

$- 0.174 \cdot T1 + 0 \cdot T2 + 0.604 \cdot T3 + 1.739 \cdot T4 + 0 \cdot N0 + 0.604 \cdot N1 + 0.279 \cdot N2$

$+ 0 \cdot \text{male} - 0.262 \cdot \text{female} + 0 \cdot \text{NoEMVI} + 0.657 \cdot \text{EMVI} + 0 \cdot \text{left\_colon} + 0.421 \cdot \text{right\_colon}$

$+ 0 \cdot \text{surgery\_only} - 0.393 \cdot \text{NeoAdj\_surgery} - 0.110 \cdot \text{Surgery\_adjuvant} + 1.582 \cdot \text{No\_surgery}$

$+ 0 \cdot \text{65years} + 0.045 \cdot \text{increased\_years\_above\_65yrs}$

$+ 0 \cdot \text{40mm\_tumor\_size} - 0.010 \cdot \text{each\_1mm\_increased\_size\_over\_40mm}$

Note: Model A used flexible parametric survival analysis based on stmp2 in STATA 14.1. The baseline hazard was selected based on comparing the smoothed baseline hazard from a Cox model to parametric baselines based on one to six degrees of freedom, which included zero to five spline knots in the baseline.

Modelling using one degree of freedom was chosen, which is a Weibull model with no spline knots, based on the lowest AIC and BIC. This also was a more credible baseline reflecting the biological rate of recurrence, as opposed to peaks that artificially reflect timing of regular yearly CT imaging when the majority of recurrences were detected. The baseline model included a constant term and a shape parameter ( $rsc$ ) which is multiplied by the natural log of time in years.

Models were fitted on the log cumulative hazard scale ( $\ln(-\ln S(t))$ ) with proportional hazards. Nested models of Model A coefficients were fitted using a fixed offset of the Model A linear predictor, allowing the effect of additional variables to be assessed. Continuous variables were centred on values close to the median: age in years was centred for 65 years and tumor size was centred at 40mm.

## References

- 1 Vergouwe Y, Royston P, Moons KG, Altman DG (2010) Development and validation of a prediction model with missing predictor data: a practical approach. *J Clin Epidemiol* 63:205-214
- 2 Sargent DJ, Patiyil S, Yothers G et al (2007) End points for colon cancer adjuvant trials: observations and recommendations based on individual patient data from 20,898 patients enrolled onto 18 randomized trials from the ACCENT Group. *J Clin Oncol* 25:4569-4574
- 3 Goh V, Halligan S, Wellsted DM, Bartram CI (2009) Can perfusion CT assessment of primary colorectal adenocarcinoma blood flow at staging predict for subsequent metastatic disease? A pilot study. *Eur Radiol* 19:79-89
- 4 Pencina MJ, D'Agostino RB, Sr., D'Agostino RB, Jr., Vasan RS (2008) Evaluating the added predictive ability of a new marker: from area under the ROC curve to reclassification and beyond. *Stat Med* 27:157-172; discussion 207-112

## Supplementary Figure

Supplementary Figure 1. Kaplan-Meier curves for high vs. low-risk patients as defined by American Joint Committee on Cancer (AJCC) stage group (Rule C).

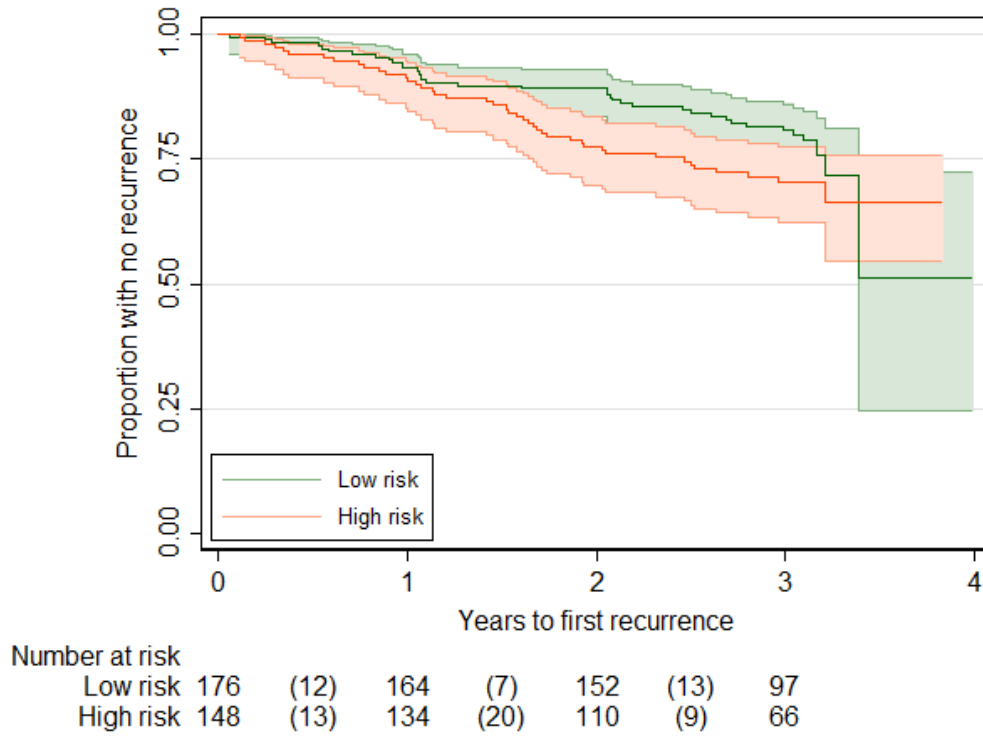

## Supplementary Tables

Supplementary Table 1. Recommended perfusion CT acquisition parameters

| Sequence                          | Topogram               | Low dose planning sequence          | Dynamic acquisition                    |
|-----------------------------------|------------------------|-------------------------------------|----------------------------------------|
| <b>Siemens</b>                    | Spiral                 | Spiral                              | Dynserio 7.2                           |
| kV                                | 120                    | 100                                 | 100                                    |
| mA<br>BMI <30                     | 36                     | 130<br>with tube current modulation | 130<br>without tube current modulation |
| mA<br>BMI >30                     | 36                     | 150<br>with tube current modulation | 150<br>without tube current modulation |
| Rotation time                     | -                      | 0.5s                                | 0.5s                                   |
| Detector configuration            | -                      | 24X1.2mm                            | 24X1.2mm                               |
| Slice collimation                 | 0.6mm                  | 5mm                                 | 7.2mm                                  |
| Temporal interval /Length of scan | Topogram length 256mm- | Pitch 1.2<br>Direction craniocaudal | Cycle time 1.5/15seconds/120seconds    |
| Reconstructed FOV                 |                        | 380mm                               | 380 mm                                 |
| Reconstruction kernel             | -                      | B30f medium smooth                  | B30f medium smooth                     |
| Reconstruction slice thickness    | -                      | 5mm                                 | 7.2mm (<64MDCT)<br>5 mm (>64 MDCT)     |
|                                   |                        |                                     |                                        |
| <b>GE</b>                         | Spiral                 | Spiral                              | Axial mode                             |
| kV                                | 120                    | 100                                 | 100                                    |
| mA<br>BMI <30                     | 30                     | 80<br>with tube current modulation  | 80<br>without tube current modulation  |
| mA<br>BMI >30                     | 30                     | 100<br>with tube current modulation | 100<br>without tube current modulation |
| Rotation time                     |                        | 0.5s                                | 0.5s                                   |
| Detector configuration            |                        |                                     | 4*5mm<br>8*5mm                         |
| Slice collimation                 | 0.6mm                  | 5mm                                 | 5mm                                    |
| Temporal interval /Length of scan | Topogram length 256mm- | Pitch 1.2<br>Direction craniocaudal | Cycle time 1.5/15 seconds/120seconds   |

|                                   |  |              |                                         |
|-----------------------------------|--|--------------|-----------------------------------------|
| Reconstruction kernel             |  | B30 soft     | B30 soft                                |
| Reconstruction slice thickness    |  | 2.5mm<br>5mm | 2.5mm<br>5mm                            |
|                                   |  |              |                                         |
| <b>Toshiba</b>                    |  |              |                                         |
| kV                                |  | 100          | 100                                     |
| mA                                |  | 100          | 100                                     |
| Rotation time                     |  | 0.5s         | 0.5s                                    |
| Detector configuration            |  | 320*0.5      | 320*0.5                                 |
| Slice collimation                 |  | 0.5mm        | 0.5mm                                   |
| Temporal interval /Length of scan |  |              | Cycle time<br>1.5/15 seconds/120seconds |
| Reconstruction kernel             |  | B30 soft     | B30 soft                                |
| Reconstruction slice thickness    |  | 5mm          | 5mm                                     |



Supplementary Table 2. Local site perfusion CT measurements for participants with and without recurrence (available for 303/326 [93%] participants). There was no difference in measures between groups.

| <b>Local review</b>                                      | <b>With recurrence</b>                  |                                                 | <b>Without recurrence</b>               |                                              |
|----------------------------------------------------------|-----------------------------------------|-------------------------------------------------|-----------------------------------------|----------------------------------------------|
| <b>Variable</b>                                          | <b>Number of participants with data</b> | <b>Mean (SD)<br/>Median (IQR)<br/>Range</b>     | <b>Number of participants with data</b> | <b>Mean (SD)<br/>Median (IQR)<br/>Range</b>  |
| Blood flow (mL/min/100mL or 100g)                        | 78                                      | 72.9 (40.4)<br>62.5 (52.6, 85.1)<br>27.5, 350.8 | 225                                     | 69.2 (35.7)<br>63.1 (47.3, 81.9)<br>0, 248.0 |
| Blood volume (mL/100mL or 100g)                          | 76                                      | 13.1 (8.4)<br>11.3 (6.5, 16.3)<br>0.6, 46.7     | 220                                     | 12.9 (7.4)<br>12.5 (6.8, 16.5)<br>0, 45.5    |
| Permeability surface area product (mL/min/100mL or 100g) | 70                                      | 18.1 (14.9)<br>13.8 (8.8, 19.9)<br>0.3, 66.8    | 199                                     | 16.5 (13.4)<br>12.8 (8.9, 18)<br>0, 72.1     |
| Mean transit time (seconds)                              | 68                                      | 13.2 (5.8)<br>11.6 (9, 17.7)<br>4.4, 29.7       | 186                                     | 13.8 (5.8)<br>13.3 (9.2, 18.1)<br>3.4, 33.6  |

Supplementary Table 3. Immunohistochemical scores for participants with and without recurrence.

| <b>Variable Score</b>           | <b>With recurrence</b> | <b>Without recurrence</b> | <b>Total</b> |
|---------------------------------|------------------------|---------------------------|--------------|
| <b>Hif-1<math>\alpha</math></b> | <b>N (%)</b>           | <b>N (%)</b>              | <b>N (%)</b> |
| 0                               | 18 (29)                | 58 (27)                   | 76 (28)      |
| 1                               | 5 (8)                  | 24 (11)                   | 29 (11)      |
| 2                               | 11 (18)                | 35 (17)                   | 46 (17)      |
| 3                               | 1 (2)                  | 4 (2)                     | 5 (2)        |
| 4                               | 11 (18)                | 40 (19)                   | 51 (19)      |
| 6                               | 15 (24)                | 46 (22)                   | 61 (22)      |
| Missing                         | 1 (2)                  | 5 (2)                     | 6 (2)        |
| <b>VEGF</b>                     | <b>N (%)</b>           | <b>N (%)</b>              | <b>N (%)</b> |
| 0                               | 55 (89)                | 199 (94)                  | 254 (93)     |
| 2                               | 2 (3)                  | 4 (2)                     | 6 (2)        |
| 3                               | 2 (3)                  | 3 (1)                     | 5 (2)        |
| 4                               | 2 (3)                  | 2 (1)                     | 4 (1)        |
| Missing                         | 1 (2)                  | 4 (2)                     | 5 (2)        |
| <b>Glut1</b>                    | <b>N (%)</b>           | <b>N (%)</b>              | <b>N (%)</b> |
| 0                               | 2 (3)                  | 10 (5)                    | 12 (4)       |
| 1                               | 0 (0)                  | 1 (0)                     | 1 (0)        |
| 2                               | 0 (0)                  | 5 (2)                     | 5 (2)        |
| 3                               | 2 (3)                  | 8 (4)                     | 10 (4)       |
| 4                               | 4 (6)                  | 13 (6)                    | 17 (6)       |
| 5                               | 5 (8)                  | 18 (8)                    | 23 (8)       |
| 6                               | 18 (29)                | 56 (26)                   | 74 (27)      |
| 7                               | 10 (16)                | 46 (22)                   | 56 (20)      |
| 8                               | 20 (32)                | 51 (24)                   | 71 (26)      |
| Missing                         | 1 (2)                  | 4 (2)                     | 5 (2)        |

Supplementary Table 4. Genetic mutation frequency for participants with and without recurrence.

| <b>Gene mutation</b> | <b>With recurrence</b> | <b>Without recurrence</b> | <b>Total</b> |
|----------------------|------------------------|---------------------------|--------------|
| <b>MMR</b>           | <b>N (%)</b>           | <b>N (%)</b>              | <b>N (%)</b> |
| Deficient            | 5 (8)                  | 16 (8)                    | 21 (8)       |
| Proficient           | 56 (90)                | 192 (91)                  | 248 (91)     |
| Missing data         | 1 (2)                  | 4 (2)                     | 5 (2)        |
| <b>KRAS</b>          | <b>N (%)</b>           | <b>N (%)</b>              | <b>N (%)</b> |
| KRAS wild type       | 34 (55)                | 96 (45)                   | 130 (47)     |
| KRAS mutation        | 28 (45)                | 112 (53)                  | 140 (51)     |
| Missing data         | 0 (0)                  | 4 (2)                     | 4 (1)        |
| <b>NRAS</b>          | <b>N (%)</b>           | <b>N (%)</b>              | <b>N (%)</b> |
| NRAS wild type       | 55 (89)                | 188 (89)                  | 243 (89)     |
| NRAS mutation        | 7 (11)                 | 20 (9)                    | 27 (10)      |
| Missing data         | 0 (0)                  | 4 (2)                     | 4 (1)        |
| <b>HRAS</b>          | <b>N (%)</b>           | <b>N (%)</b>              | <b>N (%)</b> |
| HRAS wild type       | 52 (84)                | 184 (87)                  | 236 (86)     |
| HRAS mutation        | 10 (16)                | 24 (11)                   | 34 (12)      |
| Missing data         | 0 (0)                  | 4 (2)                     | 4 (1)        |
| <b>BRAF V600E</b>    | <b>N (%)</b>           | <b>N (%)</b>              | <b>N (%)</b> |
| BRAF V600E wild type | 59 (95)                | 192 (91)                  | 251 (92)     |
| BRAF V600E mutation  | 3 (5)                  | 16 (8)                    | 19 (7)       |
| Missing data         | 0 (0)                  | 4 (2)                     | 4 (1)        |
| <b>BRAF other</b>    | <b>N (%)</b>           | <b>N (%)</b>              | <b>N (%)</b> |
| BRAF other wild type | 53 (85)                | 172 (81)                  | 225 (82)     |
| BRAF other mutation  | 9 (15)                 | 36 (17)                   | 45 (16)      |
| Missing data         | 0 (0)                  | 4 (2)                     | 4 (1)        |

Supplementary Table 5. Univariable hazard ratios for standard clinicopathological variables included in Model A.

| Variable                                          | N   | HR (95% CI)         | p-value* |
|---------------------------------------------------|-----|---------------------|----------|
| T stage                                           |     |                     |          |
| T1                                                | 324 | 0.61 (0.08 to 4.6)  | <0.001   |
| T2 (reference)                                    | 324 | 1 (1 to 1)          |          |
| T3                                                | 324 | 2.01 (1.06 to 3.79) |          |
| T4                                                | 324 | 5.48 (2.72 to 11)   |          |
| N stage                                           |     |                     |          |
| N1 (1 LN positive)                                | 324 | 1.22 (0.74 to 2.03) | 0.11     |
| N2 (2 or more positive)                           | 324 | 1.82 (1.04 to 3.19) |          |
| EMVI                                              | 324 | 2.37 (1.53 to 3.67) | <0.001   |
| Treatment group (reference group is Surgery only) |     |                     | <0.001   |
| Neoadjuvant therapy +Surgery                      | 324 | 1.03 (0.56 to 1.89) |          |
| Surgery + adjuvant therapy                        | 324 | 1.11 (0.65 to 1.91) |          |
| No surgery                                        | 324 | 6.12 (3.14 to 11)   |          |
| Rectal (ref Left Colon)                           | 324 | 0.95 (0.61 to 1.47) | 0.81     |
| Right colon location                              | 324 | 1.81 (1.1 to 2.98)  | 0.02     |
| Tumour size (mm)                                  | 324 | 1.00 (0.99 to 1.01) | 0.96     |
| Age (years)                                       | 324 | 1.06 (1.03 to 1.08) | <0.001   |
| Sex (male reference)                              | 324 | 1.01 (0.63 to 1.62) | 0.96     |

\* Overall Wald test for categorical data of more than two categories

\* Left colon location is reference. Mid location is grouped with left

Supplementary Table 6. Multivariable hazard ratios for standard clinicopathological variables included in Model A.

| Variable                                          | N   | HR (95% CI)         | p-value* |
|---------------------------------------------------|-----|---------------------|----------|
| T stage                                           |     |                     |          |
| T1                                                | 324 | 0.84 (0.11 to 6.52) | <0.001   |
| T2 (reference)                                    | 324 | 1 (1 to 1)          |          |
| T3                                                | 324 | 1.83 (0.90 to 3.70) |          |
| T4                                                | 324 | 5.69 (2.52 to 12)   |          |
| N stage                                           |     |                     |          |
| N1 (1 LN positive)                                | 324 | 1.10 (0.60 to 2.01) | 0.69     |
| N2 (2 or more positive)                           | 324 | 1.32 (0.70 to 2.51) |          |
| EMVI                                              | 324 | 1.93 (1.17 to 3.19) | 0.01     |
| Treatment group (reference group is Surgery only) |     |                     | <0.001   |
| Neoadjuvant therapy + surgery                     | 324 | 0.67 (0.35 to 1.30) |          |
| Surgery + adjuvant therapy                        | 324 | 0.90 (0.42 to 1.92) |          |
| No surgery                                        | 324 | 4.87 (2.37 to 10)   |          |
| Right colon location (left is reference)          | 324 | 1.52 (0.88 to 2.65) | 0.14     |
| Tumour size (mm)                                  | 324 | 0.99 (0.98 to 1.00) | 0.19     |
| Age (years)                                       | 324 | 1.05 (1.02 to 1.07) | <0.001   |
| Sex (male reference)                              | 324 | 0.77 (0.47 to 1.26) | 0.30     |
| Rcs1                                              | 324 | 2.30 (1.95 to 2.71) |          |
| Constant                                          | 324 | 0.07 (0.04 to 0.14) |          |

\* overall Wald test for categorical data of more than two categories

\* Age is centred at 65 years and tumour size is centred at 40mm. Constant term when Model A is not centred is 0.006

Supplementary Table 7. Univariable hazard ratios for immunohistochemical and somatic mutation variables.

| Variables    | N   | HR (95% CI)         | p-value |
|--------------|-----|---------------------|---------|
| CD105        | 253 | 1.00 (0.99 to 1.00) | 0.83    |
| Hif1a**      | 253 | 1.02 (0.61 to 1.71) | 0.94    |
| MMR          | 253 | 0.85 (0.34 to 2.11) | 0.72    |
| BRAF not 600 | 253 | 0.67 (0.30 to 1.48) | 0.32    |
| BRAF 600     | 253 | 0.69 (0.22 to 2.20) | 0.53    |
| KRAS         | 253 | 0.71 (0.42 to 1.19) | 0.19    |
| HRAS         | 253 | 1.34 (0.63 to 2.82) | 0.44    |
| NRAS         | 253 | 1.33 (0.60 to 2.92) | 0.48    |

\*\*binary form Hif1a\_2w 0=0-2, 1=3-6

\* MMR proficient compared to a reference standard of deficient. Deficient refers to tumour with mutation.

Supplementary Table 8. Multivariable hazard ratios for immunohistochemical and somatic mutation variables.

|                          | N   | HR (95% CI)          | p-value |
|--------------------------|-----|----------------------|---------|
| ModelA_323               | 212 | 2.718 constrained    |         |
| CD105                    | 212 | 1.00 (0.99 to 1.01)  | 0.56    |
| MMR*                     | 212 | 0.64 (0.24 to 1.68)  | 0.36    |
| Hif1a**                  | 212 | 1.33 (0.74 to 2.34)  | 0.34    |
| BRAF not 600             | 212 | 0.57 (0.23 to 1.40)  | 0.22    |
| BRAF 600                 | 212 | 0.34 (0.08 to 1.50)  | 0.16    |
| KRAS                     | 212 | 0.57 (0.31 to 1.06)  | 0.08    |
| HRAS                     | 212 | 1.99 (0.88 to 4.55)  | 0.10    |
| NRAS                     | 212 | 2.32 (0.93 to 5.78)  | 0.07    |
| baseline survival (rcs1) | 212 | 2.19 (1.79 to 2.69)  | <0.001  |
| Constant                 | 212 | 0.01 (0.004 to 0.05) | <0.001  |
